# Supplementary material
Source: MDPI journal article supplement (https://www.mdpi.com/2673-4176/3/1/16)
Supplement: s1 [file s1 › polysaccharides-1599203-supplementary.pdf]

## Supplementary Files

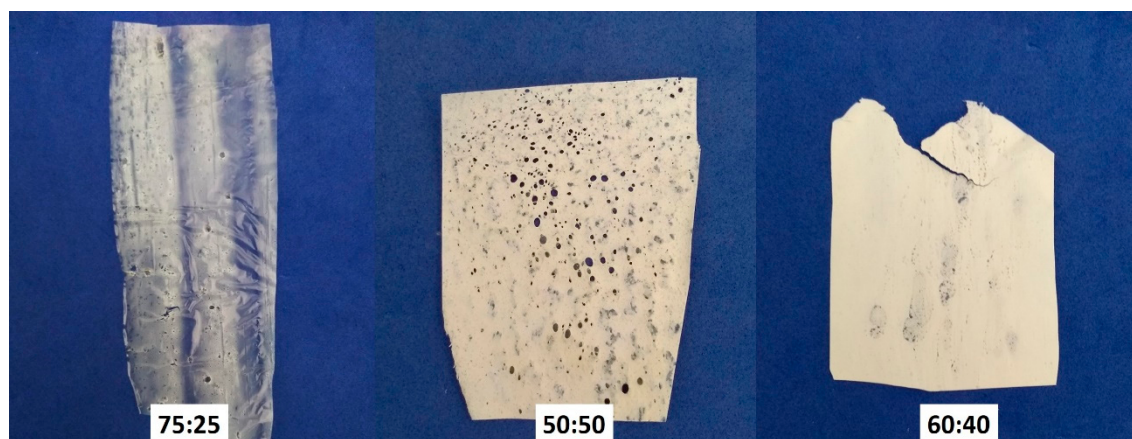

**Figure S1.** Cellulose acetate and zein blends prepared with different polymer ratios (wt/wt).

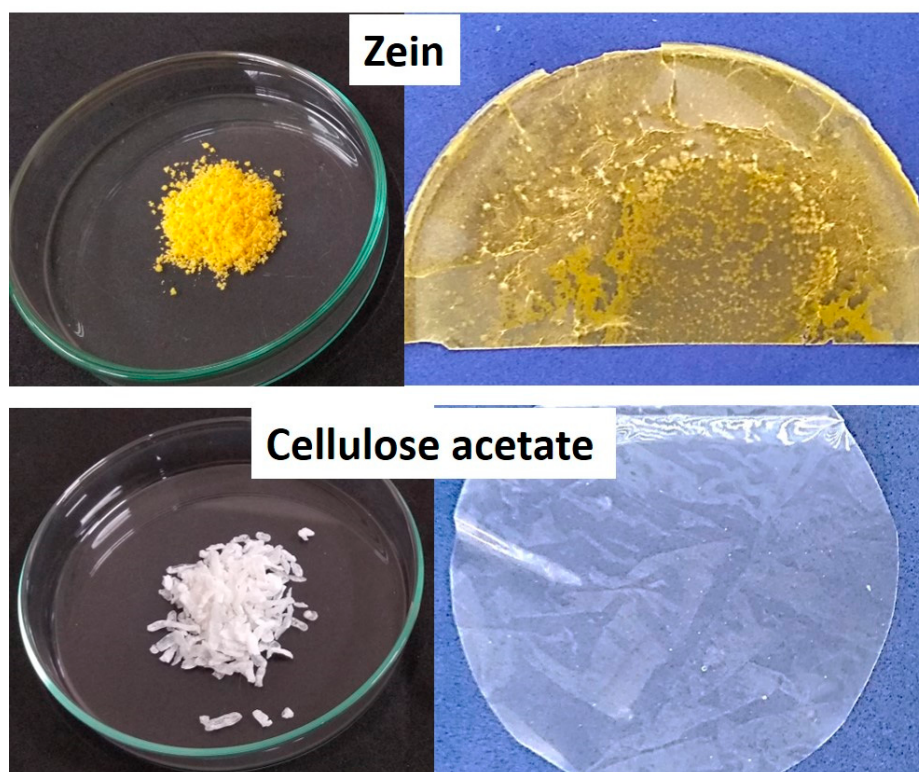

**Figure S2.** Cellulose acetate and zein as pellets and films.

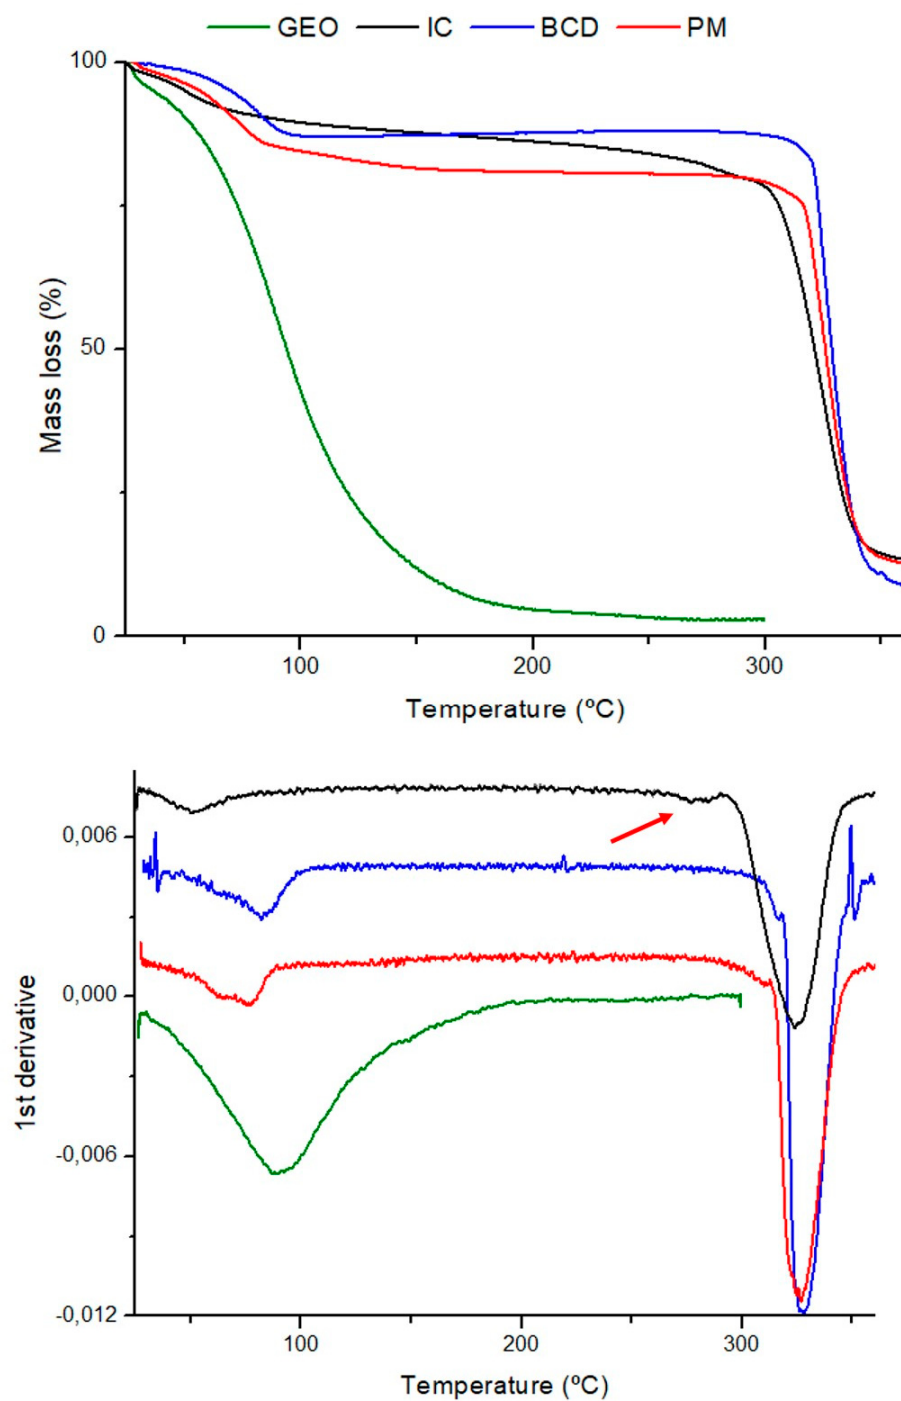

**Figure S3.** Thermogravimetric (TG) curves and their derivative (DTG) of  $\beta$ CD, inclusion complex (IC), garlic essential oil (GEO), and physical mixture (PM). \*The red arrow indicates GEO loss in the inclusion complex.

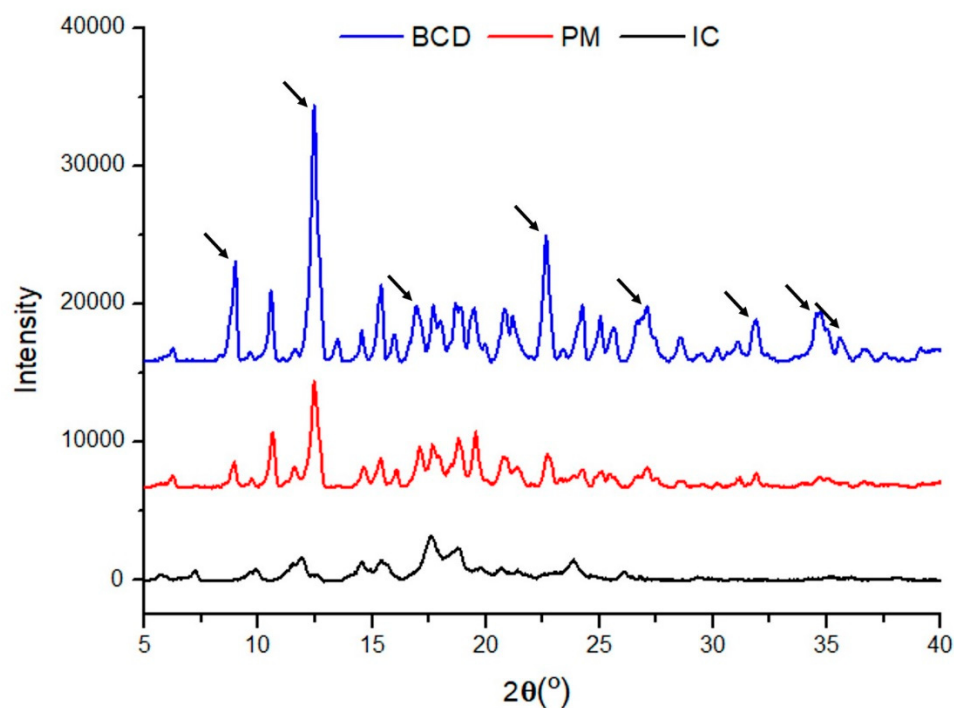

**Figure S4.** X-ray diffractograms of  $\beta$ CD, inclusion complex (IC), and physical mixture (PM). \*Black arrows indicate the characteristic peaks for  $\beta$ CD.

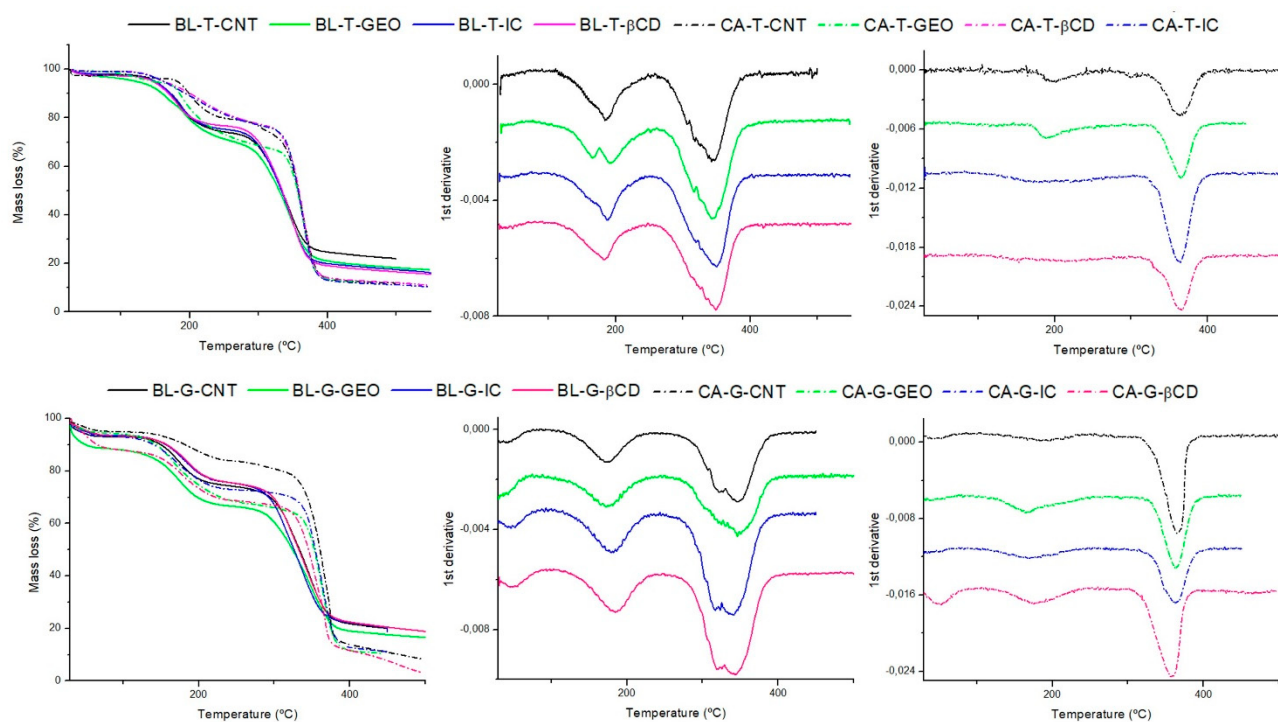

**Figure S5.** Thermogravimetric (TG) curves and their derivative (DTG) of cellulose acetate (CA) films and CA:zein blends incorporated with tributyrin (T) or glycerol (G) as plasticizers, and garlic essential oil (GEO),  $\beta$ -cyclodextrin ( $\beta$ CD), or inclusion complex (IC).
